# Supplementary material
Source: PubMed Central journal article supplement (PMC1691583)
Supplement: 15058437s01.pdf [file 15058437s01.pdf]

These are an electronic appendices to the paper by Spottiswoode & Møller 2004 Genetic similarity and hatching success in birds. *Proc. R. Soc. Lond. B* **271**, 267–272. (DOI 10.1098/rspb.2003.2605.)

Electronic appendices are refereed with the text. However, no attempt is made to impose a uniform editorial style on the electronic appendices.

**Electronic Appendix A.** Information on minisatellite band sharing coefficients, hatching success (%), body mass (g), cooperative breeding, coloniality and island distributions in birds.

|                                   | Band sharing | Hatching success | Body mass | Coloniality | Cooperativebreeding | Island distribution | References for band sharing                                   | References for hatching success                  |
|-----------------------------------|--------------|------------------|-----------|-------------|---------------------|---------------------|---------------------------------------------------------------|--------------------------------------------------|
| <i>Acrocephalus arundinaceus</i>  | 0.279        | 92.4             | 27.2      |             |                     |                     | Hasselquist <i>et al.</i> 1996;<br>Leisler <i>et al.</i> 2000 | Cramp & Brooks 1992; Glutz<br>von Blotzheim 1991 |
| <i>Acrocephalus palustris</i>     | 0.200        | 94.8             | 11.9      |             |                     |                     | Leisler & Wink 2000                                           | Cramp & Brooks 1992                              |
| <i>Acrocephalus schoenobaenus</i> | 0.269        | 94.4             | 11.2      |             |                     |                     | Buchanan & Catchpole 2000;<br>Langefors <i>et al.</i> 1998    | Cramp & Brooks 1992; Glutz<br>von Blotzheim 1991 |
| <i>Acrocephalus vaughani</i>      | 0.188        | 95.7             | 24.5      |             | yes                 | yes                 | Brooke & Hartley 1995                                         | M. de L. Brooke, pers. comm.                     |
| <i>Agelaius phoeniceus</i>        | 0.292        | 88.7             | 52.6      |             |                     |                     | Gibbs <i>et al.</i> 1990; Gray<br>1996; Westneat 1993         | Yasukawa & Searcy 1995                           |
| <i>Anser caerulescens</i>         | 0.212        | 94.9             | 2649.6    | yes         |                     |                     | Dunn <i>et al.</i> 1999                                       | Mawbray <i>et al.</i> 2000                       |
| <i>Anser rossi</i>                | 0.213        | 97.5             | 1589.5    | yes         |                     |                     | Dunn <i>et al.</i> 1999                                       | Ryder & Alisauskas 1995                          |

|                                |       |       |        |     |     |  |  |                                                             |                                                   |
|--------------------------------|-------|-------|--------|-----|-----|--|--|-------------------------------------------------------------|---------------------------------------------------|
| <i>Anthus spinoletta</i>       | 0.236 | 90.3  | 23.9   |     |     |  |  | Reyer <i>et al.</i> 1997                                    | Rauter 1996                                       |
| <i>Aphelocoma coerulescens</i> | 0.275 | 88.8  | 80.2   | yes |     |  |  | Quinn <i>et al.</i> 1999                                    | Woolfenden & Fitzpatrick 1984                     |
| <i>Apus apus</i>               | 0.173 | 79.8  | 37.6   | yes |     |  |  | Martins <i>et al.</i> 2002                                  | Cramp 1985                                        |
| <i>Athene noctua</i>           | 0.22  | 90.95 | 164    |     |     |  |  | Müller <i>et al.</i> 2001                                   | Schönn <i>et al.</i> 1991                         |
| <i>Branta leucopsis</i>        | 0.320 | 71.9  | 1687.0 | yes |     |  |  | Choudhury <i>et al.</i> 1993;<br>Larsson <i>et al.</i> 1995 | Cramp 1977; Glutz von<br>Blotzheim 1968           |
| <i>Buteo galapagoensis</i>     | 0.685 | 45.0  | 1400   | yes | yes |  |  | Faaborg <i>et al.</i> 1995                                  | de Vries 1975                                     |
| <i>Calidris maritima</i>       | 0.260 | 100   | 81.5   |     |     |  |  | Pierce & Liffeld 1998                                       | Cramp & Simmons 1983; Glutz<br>von Blotzheim 1975 |
| <i>Calidris mauri</i>          | 0.110 | 91.0  | 30.0   |     |     |  |  | Blomqvist <i>et al.</i> 2002                                | Sandercocock 1997                                 |
| <i>Calonectris diomedea</i>    | 0.289 | 96.3  | 535.0  | yes |     |  |  | Swatschek <i>et al.</i> 1994                                | M. Wink, pers. comm.                              |
| <i>Cardinalis cardinalis</i>   | 0.190 | 86.5  | 44.7   |     |     |  |  | Ritchison <i>et al.</i> 1994                                | K. P. Eckerle & R. Breitwisch,<br>pers. comm.     |
| <i>Carpodacus mexicanus</i>    | 0.220 | 81.0  | 21.4   |     |     |  |  | Hill <i>et al.</i> 1994                                     | Hill 1993                                         |
| <i>Catharacta lonnbergi</i>    | 0.335 | 94.1  | 1922.0 | yes | yes |  |  | Millar <i>et al.</i> 1994                                   | Young 1994                                        |
| <i>Catharacta maccormicki</i>  | 0.200 | 98.3  | 1156.0 | yes |     |  |  | Millar <i>et al.</i> 1997                                   | Young 1994                                        |
| <i>Charadrius hiaticula</i>    | 0.150 | 90.8  | 64.0   |     |     |  |  | Wallander <i>et al.</i> 2001                                | J. Wallander, pers. comm.                         |
| <i>Corvus monedula</i>         | 0.085 | 99.4  | 246.0  | yes |     |  |  | Henderson <i>et al.</i> 2000                                | M. Soler, pers. comm.                             |
| <i>Cyanoliseus patagonus</i>   | 0.290 | 88.0  | 279.5  | yes |     |  |  | Masello <i>et al.</i> 2002                                  | Masello & Quillfeldt 2002                         |
| <i>Dacelo novaeguineae</i>     | 0.190 | 90.2  | 305.0  | yes | yes |  |  | Legge & Cockburn 2000                                       | Legge 2000                                        |
| <i>Delichon urbica</i>         | 0.195 | 93.2  | 14.5   | yes |     |  |  | Riley <i>et al.</i> 1995                                    | Cramp 1988; Glutz von                             |

|                               |       |      |        |     |  |  |     |  |                                                                               |                                                |
|-------------------------------|-------|------|--------|-----|--|--|-----|--|-------------------------------------------------------------------------------|------------------------------------------------|
|                               |       |      |        |     |  |  |     |  |                                                                               | Blotzheim 1985a                                |
| <i>Dendroica caerulescens</i> | 0.175 | 92.6 | 10.2   |     |  |  |     |  | Chuang <i>et al.</i> 1999                                                     | Holmes <i>et al.</i> 1992                      |
| <i>Dendroica petechia</i>     | 0.170 | 90.2 | 9.6    |     |  |  |     |  | Yezerinac <i>et al.</i> 1996                                                  | Lowther <i>et al.</i> 1999                     |
| <i>Emberiza calandra</i>      | 0.180 | 80.7 | 46.0   |     |  |  |     |  | Hartley <i>et al.</i> 1993                                                    | Cramp & Perrins 1994; Glutz von Blotzheim 1997 |
| <i>Eudypetes schlegeli</i>    | 0.580 | 86.0 | 4250.0 | yes |  |  | yes |  | St Clair <i>et al.</i> 1995                                                   | Richdale 1941                                  |
| <i>Euplectes orix</i>         | 0.088 | 90.9 | 16.3   | yes |  |  |     |  | Friedl & Klump 1999                                                           | Craig 1982; Kok <i>et al.</i> 1977             |
| <i>Falco columbarius</i>      | 0.326 | 91.3 | 190.5  |     |  |  |     |  | Warkentin <i>et al.</i> 1994                                                  | Sodhi <i>et al.</i> 1993                       |
| <i>Falco eleonora</i>         | 0.218 | 91.6 | 390.0  | yes |  |  |     |  | Swatschek <i>et al.</i> 1993                                                  | M. Wink, pers. comm.                           |
| <i>Falco naumanni</i>         | 0.216 | 92.9 | 152.5  | yes |  |  |     |  | Negro <i>et al.</i> 1996                                                      | J. L. Tella, pers. comm.                       |
| <i>Falco sparverius</i>       | 0.131 | 82.9 | 115.5  |     |  |  |     |  | Villarreal <i>et al.</i> 1998                                                 | G. Bortolotti, pers. comm.                     |
| <i>Ficedula hypoleuca</i>     | 0.184 | 90.7 | 11.6   |     |  |  |     |  | Brün <i>et al.</i> 1996; Liffeld <i>et al.</i> 1991; Rätti <i>et al.</i> 1995 | Lundberg & Alatalo 1992                        |
| <i>Fringilla coelebs</i>      | 0.162 | 86.5 | 21.4   |     |  |  |     |  | Sheldon & Burke 1994                                                          | Cramp & Perrins 1994; Glutz von Blotzheim 1997 |
| <i>Fulmarus glacialis</i>     | 0.154 | 93.0 | 544.0  | yes |  |  |     |  | Hunter <i>et al.</i> 1992                                                     | Hatch & Nettleship 1998                        |
| <i>Gallinula chloropus</i>    | 0.266 | 90.6 | 302.5  |     |  |  |     |  | McRae & Burke 1996                                                            | Glutz von Blotzheim 1973                       |
| <i>Gallinula mortieri</i>     | 0.677 | 64.6 | 400.0  | yes |  |  | yes |  | Gibbs <i>et al.</i> 1994                                                      | Higgins & Davies 1996                          |
| <i>Geothypis trichas</i>      | 0.160 | 94.2 | 10.1   |     |  |  |     |  | Peterson <i>et al.</i> 2001                                                   | P. O. Dunn, pers. comm.                        |
| <i>Guira guira</i>            | 0.270 | 69.8 | 152.0  | yes |  |  |     |  | Quinn <i>et al.</i> 1994                                                      | Macedo 1992                                    |
| <i>Haematopus ostralegus</i>  | 0.220 | 96.0 | 526.0  |     |  |  |     |  | Heg <i>et al.</i> 1993                                                        | Glutz von Blotzheim 1973                       |

|                                |       |      |        |     |     |  |                               |                                            |
|--------------------------------|-------|------|--------|-----|-----|--|-------------------------------|--------------------------------------------|
| <i>Hirundo rustica</i>         | 0.106 | 98.0 | 16.0   | yes |     |  | Møller & Tegelström 1997      | A. P. Møller, unpubl. data.                |
| <i>Lagopus lagopus</i>         | 0.292 | 89.0 | 558.5  |     |     |  | Freeland <i>et al.</i> 1995   | Hannon <i>et al.</i> 1998                  |
| <i>Lanius minor</i>            | 0.350 | 89.1 | 48.6   |     |     |  | H. Hoi, pers. comm.           | H. Hoi, pers. comm.                        |
| <i>Larus canus</i>             | 0.190 | 80.3 | 403.5  | yes |     |  | Bukacinska <i>et al.</i> 1998 | D. Bukacinski & M. Bukacinska, pers. comm. |
| <i>Larus occidentalis</i>      | 0.340 | 76.0 | 1011.0 | yes |     |  | Gilbert <i>et al.</i> 1998    | Gilbert 1996                               |
| <i>Loxioides bailleui</i>      | 0.270 | 61.0 | 36.0   |     | yes |  | Fleischer <i>et al.</i> 1994  | Pratt <i>et al.</i> 1997                   |
| <i>Luscinia svecica</i>        | 0.290 | 90.3 | 16.8   |     |     |  | Krokene <i>et al.</i> 1996    | Cramp 1988; Glutz von Blotzheim 1988       |
| <i>Malurus cyaneus</i>         | 0.224 | 94.3 | 9.0    | yes |     |  | Dunn & Cockburn 1999          | A. Cockburn, pers. comm.                   |
| <i>Manorina melanophrys</i>    | 0.360 | 89.4 | 31.6   | yes |     |  | Pöldmaa <i>et al.</i> 1995    | R. J. Robertson & M. Clarke, pers. comm.   |
| <i>Melanerpes formicivorus</i> | 0.226 | 85.9 | 80.5   | yes |     |  | Dickinson <i>et al.</i> 1995  | Koenig 1982                                |
| <i>Nectarinia osea</i>         | 0.385 | 80.7 | 7.6    |     |     |  | Zilberman <i>et al.</i> 1999  | Y. Yom-Tov, pers. comm.                    |
| <i>Oceanites oceanicus</i>     | 0.300 | 87.0 | 51.0   | yes |     |  | Quillfeldt <i>et al.</i> 2001 | P. Quillfeldt, pers. comm.                 |
| <i>Oceanodroma leucorhoa</i>   | 0.580 | 75.7 | 35.2   | yes |     |  | Mauck <i>et al.</i> 1995      | Huntington <i>et al.</i> 1996              |
| <i>Oenanthe oenanthe</i>       | 0.210 | 99.3 | 26.5   |     |     |  | Currie <i>et al.</i> 1998     | T. Pärt, pers. comm.                       |
| <i>Panurus biarmicus</i>       | 0.300 | 89.9 | 15.7   |     |     |  | Hoi & Hoi-Leitner 1997        | H. Hoi, pers. comm.                        |
| <i>Parus ater</i>              | 0.170 | 92.5 | 9.1    |     |     |  | Lubjuhn <i>et al.</i> 1999    | Glutz von Blotzheim & Bauer 1993           |
| <i>Parus atricapillus</i>      | 0.051 | 90.0 | 10.8   |     |     |  | Otter <i>et al.</i> 1998      | K. Otter pers. comm.                       |

|                                  |       |       |        |     |  |  |  |                                                               |                                                            |
|----------------------------------|-------|-------|--------|-----|--|--|--|---------------------------------------------------------------|------------------------------------------------------------|
| <i>Parus caeruleus</i>           | 0.181 | 90.4  | 13.3   |     |  |  |  | Gullberg <i>et al.</i> 1992;<br>Kempenaers <i>et al.</i> 1995 | Glutz von Blotzheim & Bauer<br>1993                        |
| <i>Parus major</i>               | 0.215 | 92.2  | 19.0   |     |  |  |  | Gullberg <i>et al.</i> 1992                                   | Glutz von Blotzheim & Bauer<br>1993                        |
| <i>Parus montanus</i>            | 0.200 | 82.5  | 10.2   |     |  |  |  | Orell <i>et al.</i> 1997                                      | Glutz von Blotzheim & Bauer<br>1993                        |
| <i>Passer domesticus</i>         | 0.218 | 90.5  | 27.7   | yes |  |  |  | Veiga & Boto 2000;<br>Whitekiller <i>et al.</i> 2000          | Whitekiller <i>et al.</i> 2000; P. L.<br>Veiga pers. comm. |
| <i>Passerculus sandwichensis</i> | 0.312 | 92.9  | 22.7   |     |  |  |  | Freeman-Gallant 1997                                          | Wheelwright & Rising 1993                                  |
| <i>Perisoreus infaustus</i>      | 0.430 | 90.9  | 84.4   |     |  |  |  | Ekman <i>et al.</i> 1994                                      | J. Ekman, pers. comm.                                      |
| <i>Phalacrocorax aristotelis</i> | 0.380 | 90.50 | 1769.0 | yes |  |  |  | Graves <i>et al.</i> 1993                                     | Cramp 1977; Glutz von<br>Blotzheim 1968                    |
| <i>Phalaropus fulicarius</i>     | 0.186 | 92.1  | 55.7   |     |  |  |  | Dale <i>et al.</i> 1999                                       | R. D. Montgomery, pers.<br>comm.                           |
| <i>Phalaropus tricolor</i>       | 0.270 | 99.7  | 60.0   |     |  |  |  | Delehanty <i>et al.</i> 1998                                  | Colwell & Jehl 1994                                        |
| <i>Pica pica</i>                 | 0.155 | 96.1  | 177.5  |     |  |  |  | Parrott 1995                                                  | T. R. Birkhead, pers. comm.                                |
| <i>Picoides borealis</i>         | 0.520 | 85.9  | 43.6   | yes |  |  |  | Haig <i>et al.</i> 1994                                       | LaBranche & Walters 1994                                   |
| <i>Progne subis</i>              | 0.140 | 89.3  | 49.4   | yes |  |  |  | Morton <i>et al.</i> 1990; Wagner<br><i>et al.</i> 1996       | Brown 1997                                                 |
| <i>Promerops cafer</i>           | 0.200 | 100   | 36.5   |     |  |  |  | Henderson 2000                                                | Broekhuysen 1959                                           |
| <i>Prunella collaris</i>         | 0.136 | 90.3  | 43.7   | yes |  |  |  | Hartley <i>et al.</i> 1995                                    | Cramp 1988; Glutz von                                      |

|                              |       |      |        |     |  |                                                                                |                                                          |
|------------------------------|-------|------|--------|-----|--|--------------------------------------------------------------------------------|----------------------------------------------------------|
| <i>Prunella modularis</i>    | 0.240 | 86.3 | 19.8   | yes |  | Burke <i>et al.</i> 1989                                                       | Blotzheim 1985b<br>Cramp 1988; Glutz von Blotzheim 1985b |
| <i>Puffinus tenuirostris</i> | 0.298 | 94.0 | 543.0  | yes |  | Austin & Parkin 1996                                                           | Marchant & Higgins 1990                                  |
| <i>Pygoscelis adeliae</i>    | 0.240 | 86.9 | 4850.0 | yes |  | Pilastro <i>et al.</i> 2001                                                    | Marchant & Higgins 1990                                  |
| <i>Pygoscelis antarctica</i> | 0.121 | 95.5 | 4150.0 | yes |  | Moreno <i>et al.</i> 2000                                                      | A. de Leon, pers. comm.                                  |
| <i>Quiscalus major</i>       | 0.190 | 92.8 | 166.5  |     |  | Poston <i>et al.</i> 1999                                                      | Post <i>et al.</i> 1996                                  |
| <i>Remiz pendulinus</i>      | 0.390 | 80.9 | 9.3    | yes |  | Schleicher <i>et al.</i> 1997                                                  | H. Hoi, pers. comm.                                      |
| <i>Riparia riparia</i>       | 0.196 | 95.8 | 14.6   | yes |  | Alves & Bryant 1998                                                            | Cramp 1988; Glutz von Blotzheim 1985a                    |
| <i>Sayornis phoebe</i>       | 0.206 | 95.2 | 19.8   |     |  | Conrad <i>et al.</i> 1998                                                      | H. P. Weeks Jr, pers. comm.                              |
| <i>Sericornis frontalis</i>  | 0.172 | 93.0 | 12.8   | yes |  | Whittingham <i>et al.</i> 1997                                                 | R. D. Magrath, pers. comm.                               |
| <i>Sialia mexicana</i>       | 0.230 | 70.5 | 28.1   | yes |  | Dickinson & Akre 1998                                                          | Fair & Myers 2002                                        |
| <i>Sialia sialis</i>         | 0.160 | 83.0 | 31.6   |     |  | Meek <i>et al.</i> 1994                                                        | Gowaty & Plissner 1998                                   |
| <i>Sturnus vulgaris</i>      | 0.148 | 90.5 | 82.3   | yes |  | Pinxten <i>et al.</i> 1993; Smith <i>et al.</i> 1996; Smith & von Schantz 1993 | Cramp & Perrins 1994; Glutz von Blotzheim 1993           |
| <i>Tachycineta bicolor</i>   | 0.224 | 87.0 | 20.1   | yes |  | Barber <i>et al.</i> 1996; Liffield <i>et al.</i> 1993                         | Robertson <i>et al.</i> 1992                             |
| <i>Taeniopygia guttata</i>   | 0.164 | 83.0 | 12.0   | yes |  | Birkhead <i>et al.</i> 1990                                                    | Zann 1996                                                |
| <i>Tetrao tetrix</i>         | 0.110 | 93.2 | 1082.5 |     |  | Alatalo <i>et al.</i> 1996                                                     | Lindén 1981; Valkeajärvi & Ijäs                          |

|                                 |       |      |       |     |     |  |  |  |     |                               | 1994                                   |
|---------------------------------|-------|------|-------|-----|-----|--|--|--|-----|-------------------------------|----------------------------------------|
| <i>Thalassoica antarctica</i>   | 0.130 | 95.2 | 754.5 | yes |     |  |  |  |     | Lorentsen <i>et al.</i> 2000  | S. -H. Lorentsen, pers. comm.          |
| <i>Thryothorus ludovicianus</i> | 0.225 | 90.8 | 18.7  |     |     |  |  |  |     | Haggerty <i>et al.</i> 2001   | T. Haggerty, pers. comm.               |
| <i>Tringa macularia</i>         | 0.290 | 89.6 | 40.4  |     |     |  |  |  |     | Oring <i>et al.</i> 1992      | Oring <i>et al.</i> 1983               |
| <i>Troglodytes aedon</i>        | 0.180 | 97.0 | 10.9  |     |     |  |  |  |     | Soukup & Thompson 1997        | Johnson 1998                           |
| <i>Turdoides squamiceps</i>     | 0.655 | 88.7 | 60.0  |     | yes |  |  |  |     | Lundy <i>et al.</i> 1998      | R. Ostraicher & A. Zahavi, pers. comm. |
| <i>Turdus merula</i>            | 0.286 | 98.4 | 111.2 |     |     |  |  |  |     | Creighton 2000                | R. D. Magrath, pers. comm.             |
| <i>Tyrannus tyrannus</i>        | 0.115 | 93.9 | 43.6  |     |     |  |  |  |     | Rowe <i>et al.</i> 2001       | Koenig 1982                            |
| <i>Upupa epops</i>              | 0.180 | 92.0 | 75.0  |     |     |  |  |  |     | Martin-Vivaldi 1997           | Martin-Vivaldi <i>et al.</i> 1999      |
| <i>Uria aalge</i>               | 0.213 | 96.9 | 992.5 | yes |     |  |  |  |     | Birkhead <i>et al.</i> 2001   | T. R. Birkhead, pers. comm.            |
| <i>Wilsonia citrina</i>         | 0.261 | 91.0 | 10.5  |     |     |  |  |  |     | Stutchbury <i>et al.</i> 1997 | Moorman <i>et al.</i> 2002             |
| <i>Zosterops lateralis</i>      | 0.320 | 88.0 | 12.9  |     |     |  |  |  | yes | Robertson <i>et al.</i> 2001  | J. Kikkawa, pers. comm.                |

## References

- Alatalo, R. V., Burke, T., Dann, J., Hanotte, O., Höglund, J., Lundberg, A., Moss, R. & Rintamäki, P. T. 1996 Paternity, copulation disturbance and female choice in lekking black grouse. *Anim. Behav.* **52**, 861-873.
- Alves, M. A. S. & Bryant, D. M. 1998 Brood parasitism in the sand martin, *Riparia riparia*: evidence for two parasitic strategies in a colonial passerine. *Anim. Behav.* **56**, 1323-1331.

- Austin, J. J. & Parkin, D. T. 1996 Low frequency of extra-pair paternity in two colonies of the socially monogamous short-tailed shearwater *Puffinus tenuirostris*. *Mol. Ecol.* **5**, 145-150.
- Barber, C. A., Robertson, R. J. & Boag, P. T. 1996 The high frequency of extra-pair paternity in tree swallows is not an artifact of nestboxes. *Behav. Ecol. Sociobiol.* **38**, 425-430.
- Birkhead, T. R., Burke, T., Zann, R., Hunter, F. M. & Krupa, A. P. 1990 Extrapair paternity and intraspecific brood parasitism in wild zebra finches *Taeniopygia guttata* revealed by DNA fingerprinting. *Behav. Ecol. Sociobiol.* **27**, 315-324.
- Birkhead, T. R., Hatchwell, B. J., Lindner, R., Blomqvist, D., Pellatt, E. J., Griffith, R. & Liffield, J. T. 2001 Extra-pair paternity in the Common Murre. *Condor* **103**, 158-162.
- Blomqvist, D., Kempnaers, B., Lanctot, R. B. & Sandercock, B. K. 2002 Genetic parentage and mate guarding in the Arctic-breeding western sandpiper. *Auk* **119**, 228-233.
- Broekhuysen, G. J. 1959 The biology of the Cape sugarbird *Promerops cafer* (L.). *Proc. Pan-Afr. Ornithol. Congr. 1, Ostrich Suppl.* **3**, 180-221.
- Brooke, M. d. L. & Hartley, I. R. 1995 Nesting Henderson reed-warblers (*Acrocephalus vaughani taiti*) studied by DNA fingerprinting: unrelated coalitions in a stable habitat? *Auk* **112**, 77-86.
- Brown, C. R. 1997 Purple martin *Progne subis*. In *The birds of North America*. No. 287 (ed. A. Poole & F. Gill). Philadelphia and Washington: The Academy of Natural Science and The American Ornithologists' Union.
- Brün, J., Winkel, W., Epplen, J. T. & Lubjuhn, T. 1996 Elternschaftsnachweise bei Trauermuscheln *Ficedula hypoleuca* am Weststrand ihres mitteleuropäischen Verbreitungsareals. *J. Ornithol.* **137**, 435-446.
- Buchanan, K. L. & Catchpole, C. K. 2000 Extra-pair paternity in the socially monogamous sedge warbler *Acrocephalus schoenobaenus* as revealed by multilocus DNA fingerprinting. *Ibis* **142**, 12-20.
- Bukacinska, M., Bukacinski, D., Epplen, J. T., Sauer, K. P. & Lubjuhn, T. 1998 Low frequency of extra-pair paternity in Common Gulls (*Larus canus*) as revealed by DNA fingerprinting. *J. Ornithol.* **139**, 413-420.



- Burke, T., Davies, N. B., Bruiford, M. W. & Hatchwell, B. J. 1989 Parental care and mating behaviour of polyandrous dunnocks *Prunella modularis* related to paternity by DNA fingerprinting. *Nature* **388**, 249-251.
- Choudhury, S., Jones, C. S., Black, J. M. & Prop, J. 1993 Adoption of young and intraspecific nest parasitism in barnacle geese. *Condor* **95**, 860-868.
- Chuang, H. C., Webster, M. S. & Holmes, R. T. 1999 Extrapair paternity and local synchrony in the Black-throated Blue Warbler. *Auk* **116**, 726-736.
- Colwell, M. A. & Jehl, J. R., Jr. 1994 Wilson's phalarope *Phalaropus tricolor*. In *The birds of North America*. No. 83 (ed. A. Poole & F. Gill). Philadelphia and Washington: The Academy of Natural Science and The American Ornithologists' Union.
- Conrad, K. F., Robertson, R. J. & Boag, P. T. 1998 Frequency of extrapair young increases in second broods of eastern phoebes. *Auk* **115**, 497-502.
- Craig, A. J. F. K. 1982 Breeding success of a Red Bishop colony. *Ostrich* **53**, 182-188.
- Cramp, S. (ed.) 1977 *The Birds of the Western Palearctic*. Vol. 1. Oxford: Oxford University Press.
- Cramp, S. (ed.) 1985 *The Birds of the Western Palearctic*. Vol. 4. Oxford: Oxford University Press.
- Cramp, S. (ed.) 1988 *The Birds of the Western Palearctic*. Vol. 5. Oxford: Oxford University Press.
- Cramp, S. & Brooks, D. J. (ed.) 1992 *The Birds of the Western Palearctic*. Vol. 6. Oxford: Oxford University Press.
- Cramp, S. & Perrins, C. M. (ed.) 1994 *The Birds of the Western Palearctic*. Vol. 8. Oxford: Oxford University Press.
- Cramp, S. & Simmons, K. E. L. (ed.) 1983 *The Birds of the Western Palearctic*. Vol. 3. Oxford: Oxford University Press.
- Creighton, E. 2000 Reproductive strategies in the European blackbird, *Turdus merula*. PhD thesis: The Open University, UK.
- Currie, D. R., Burke, T., Whitney, R. L. & Thompson, D. B. A. 1998 Male and female behaviour and extra-pair paternity in the wheatear. *Anim. Behav.* **55**, 689-703.
- Dale, J., Montgomerie, R., Michaud, D. & Boag, P. 1999 Frequency and timing of extrapair fertilisation in the polyandrous red phalarope (*Phalaropus fulicarius*). *Behav. Ecol. Sociobiol.* **46**, 50-56.
- de Vries, T. 1975 The breeding biology of the Galapagos Hawk, *Buteo galapagoensis*. *Gerfaut* **65**, 29-57.
- Delehanty, D. J., Fleischer, R. C., Colwell, M. A. & Oring, L. W. 1998 Sex-role reversal and the absence of extra-pair fertilization in Wilson's phalaropes. *Anim. Behav.* **55**, 995-1002.

- Dickinson, J., Haydock, J., Koenig, W., Stanback, M. & Pitelka, F. 1995 Genetic monogamy in single-male groups of acorn woodpeckers, *Melanerpes formicivorus*. *Mol. Ecol.* **4**, 765-769.
- Dickinson, J. L. & Akre, J. J. 1998 Extrajair paternity, inclusive fitness, and within-group benefits of helping in western bluebirds. *Mol. Ecol.* **7**, 95-105.
- Dunn, P. O., Afton, A. D., Gloutney, M. L. & Alisauskas, R. T. 1999 Forced copulation results in few extrajair fertilizations in Ross's and lesser snow geese. *Anim. Behav.* **57**, 1071-1081.
- Dunn, P. O. & Cockburn, A. 1999 Extrajair mate choice and honest signaling in cooperatively breeding superb fairy-wrens. *Evolution* **53**, 938-946.
- Ekman, J., Sklepkovych, B. & Tegelstrom, H. 1994 Offspring retention in the Siberian jay (*Perisoreus infaustus*): the prolonged brood care hypothesis. *Behav. Ecol.* **5**, 245-253.
- Faaborg, J., Parker, P. G., Delay, L., De Vries, T., Bednarz, J. C., Paz, S. M., Naranjo, J. & Waite, T. A. 1995 Confirmation of cooperative polyandry in the Galapagos hawk (*Buteo galapagoensis*). *Behav. Ecol. Sociobiol.* **36**, 83-90.
- Fair, J. M. & Myers, O. B. 2002 Early reproductive success of western bluebirds and ash-throated flycatchers: a landscape-contaminant perspective. *Environ. Poll.* **118**, 321-330.
- Fleischer, R. C., Tarr, C. L. & Pratt, T. K. 1994 Genetic structure and mating system in the paila, an endangered Hawaiian honeycreeper, as assessed by DNA-fingerprinting. *Mol. Ecol.* **3**, 383-392.
- Freeland, J. R., Hannon, S. J., Dobush, G. & Boag, P. T. 1995 Extra-pair paternity in willow ptarmigan broods: measuring costs of polygyny to males. *Behav. Ecol. Sociobiol.* **36**, 349-355.
- Freeman-Gallant, C. R. 1997 Extra-pair paternity in monogamous and polygynous Savannah sparrows, *Passerculus sandwichensis*. *Anim. Behav.* **53**, 397-404.
- Friedl, T. W. P. & Klump, G. M. 1999 Determinants of male mating success in the red bishop (*Euplectes orix*). *Behav. Ecol. Sociobiol.* **46**, 387-399.
- Gibbs, H. L., Goldizen, A. W., Bullough, C. & Goldizen, A. R. 1994 Parentage analysis of multi-male social groups of Tasmanian native hens (*Tribonyx mortierii*): genetic evidence for monogamy and polyandry. *Behav. Ecol. Sociobiol.* **35**, 363-371.

- Gibbs, H. L., Weatherhead, P. J., Boag, P. T., White, B. N., Tabak, L. M. & Hoysak, D. J. 1990 Realized reproductive success of polygynous Red-winged Blackbirds revealed by DNA markers. *Science* **250**, 138-139.
- Gilbert, L. 1996 Sperm competition in the western gull. DPhil thesis. Sheffield: University of Sheffield.
- Gilbert, L., Burke, T. & Krupa, A. 1998 No evidence for extra-pair paternity in the western gull. *Mol. Ecol.* **7**, 1549-1552.
- Glutz von Blotzheim, U. N. (ed.) 1968 *Handbuch der Vögel Mitteleuropas. Vol. 2*. Wiesbaden: Akademische Verlagsgesellschaft.
- Glutz von Blotzheim, U. N. (ed.) 1973 *Handbuch der Vögel Mitteleuropas. Vol. 5*. Wiesbaden: Akademische Verlagsgesellschaft.
- Glutz von Blotzheim, U. N. (ed.) 1975 *Handbuch der Vögel Mitteleuropas. Vol. 6*. Wiesbaden: Akademische Verlagsgesellschaft.
- Glutz von Blotzheim, U. N. (ed.) 1985a *Handbuch der Vögel Mitteleuropas. Vol. 10/I*. Wiesbaden: AULA-Verlag.
- Glutz von Blotzheim, U. N. (ed.) 1985b *Handbuch der Vögel Mitteleuropas. Vol. 10/II*. Wiesbaden: AULA-Verlag.
- Glutz von Blotzheim, U. N. (ed.) 1988 *Handbuch der Vögel Mitteleuropas. Vol. 11/I*. Wiesbaden: AULA-Verlag.
- Glutz von Blotzheim, U. N. (ed.) 1991 *Handbuch der Vögel Mitteleuropas. Vol. 12/I*. Wiesbaden: AULA-Verlag.
- Glutz von Blotzheim, U. N. (ed.) 1993 *Handbuch der Vögel Mitteleuropas. Vol. 13/III*. Wiesbaden: AULA-Verlag.
- Glutz von Blotzheim, U. N. (ed.) 1997 *Handbuch der Vögel Mitteleuropas. Vol. 14/III*. Wiesbaden: AULA-Verlag.
- Glutz von Blotzheim, U. N. & Bauer, K. M. (ed.) 1993 *Handbuch der Vögel Mitteleuropas. Vol. 13/I*. Wiesbaden: AULA-Verlag.
- Gowaty, P. A. & Plissner, J. H. 1998 Eastern bluebird *Sialia sialis*. In *The birds of North America. No. 381* (ed. A. Poole & F. Gill). Philadelphia and Washington: The Academy of Natural Science and The American Ornithologists' Union.
- Graves, J., Ortega-Ruano, J. & Slater, P. J. B. 1993 Extra-pair copulations and paternity in shags: do females choose better males? *Proc. R. Soc. Lond. B* **253**, 3-7.
- Gray, E. M. 1996 Female control of offspring paternity in a western population of red-winged blackbirds (*Agelaius phoeniceus*). *Behav. Ecol. Sociobiol.* **38**, 267-278.
- Gullberg, A., Tegelström, H. & Gelter, H. P. 1992 DNA fingerprinting reveals multiple paternity in families of great and blue tits (*Parus major* and *P. caeruleus*). *Hereditas* **117**, 103-108.

- Haggerty, T. M., Morton, E. S. & Fleischer, R. C. 2001 Genetic monogamy in the Carolina Wren (*Thryothorus ludovicianus*). *Auk* **118**, 215-219.
- Haug, S. M., Walters, J. R. & Plissner, J. H. 1994 Genetic evidence for monogamy in the cooperatively breeding red-cockaded woodpecker. *Behav. Ecol. Sociobiol.* **34**, 295-303.
- Hannon, S. J., Eason, P. K. & Martin, K. 1998 Willow ptarmigan *Lagopus lagopus*. In *The birds of North America*. No. 369 (ed. A. Poole & F. Gill). Philadelphia and Washington: The Academy of Natural Science and The American Ornithologists' Union.
- Hartley, I. R., Davies, N. B., Hatchwell, B. J., Desrochers, A., Nebel, D. & Burke, T. 1995 The polygynandrous mating system of the alpine accentor, *Prunella collaris*. II. Multiple paternity and parental effort. *Anim. Behav.* **49**, 789-803.
- Hartley, I. R., Shepherd, M., Robson, T. & Burke, T. 1993 Reproductive success of polygynous male corn buntings (*Miliaria calandra*) as confirmed by DNA fingerprinting. *Behav. Ecol.* **4**, 310-317.
- Hasselquist, D., Bensch, S. & von Schantz, T. 1996 Correlation between male song repertoire, extra-pair fertilizations and offspring survival in the great reed warbler. *Nature* **381**, 229-232.
- Hatch, S. A. & Nettleship, D. N. 1998 Northern fulmar *Fulmarus glacialis*. In *The birds of North America*. No. 361 (ed. A. Poole & F. Gill). Philadelphia and Washington: The Academy of Natural Science and The American Ornithologists' Union.
- Heg, D., Ens, B. J., Burke, T., Jenkins, L. & Kruijt, J. P. 1993 Why does the typically monogamous oystercatcher (*Haematopus ostralegus*) engage in extra-pair copulations? *Behaviour* **126**, 247-289.
- Henderson, C. L. 2000 Provisioning, paternity and reproductive success in the Cape Sugarbird *Promerops cafer*. MSc thesis. Stellenbosch, South Africa: University of Stellenbosch.
- Henderson, I. G., Hart, P. J. B. & Burke, T. 2000 Strict monogamy in a semi-colonial passerine, the Jackdaw (*Corvus monedula*). *J. Avian Biol.* **31**, 177-182.
- Higgins, P. J. & Davies, S. J. F. (ed.) 1996 *Handbook of Australian, New Zealand and Antarctic birds. Vol. 3*. Melbourne: Oxford University Press.
- Hill, G. E. 1993 House finch *Carpodacus mexicanus*. In *The birds of North America*. No. 184 (ed. A. Poole & F. Gill). Philadelphia and Washington: The Academy of Natural Science and The American Ornithologists' Union.

- Hill, G. E., Montgomerie, R., Roeder, C. & Boag, P. 1994 Sexual selection and cuckoldry in a monogamous songbird - implications for sexual selection theory. *Behav. Ecol. Sociobiol.* **35**, 193-199.
- Hoi, H. & Hoi-Leitner, M. 1997 An alternative route to coloniality in the bearded tit: females pursue extra-pair fertilizations. *Behav. Ecol.* **8**, 113-119.
- Holmes, R. T., Sherry, T. W., Marra, P. P. & Petit, K. E. 1992 Multiple brooding and productivity of a Neotropical migrant, the black-throated blue warbler (*Dendroica caerulescens*) in an unfragmented temperate forest. *Auk* **109**, 321-333.
- Hunter, F. M., Burke, T. & Watts, S. E. 1992 Frequent copulation as a method of paternity assurance in the northern fulmar. *Anim. Behav.* **44**, 149-156.
- Huntington, C. E., Butler, R. G. & Mauck, R. A. 1996 Leach's storm petrel *Oceanodroma leucorhoa*. In *The birds of North America*. No. 233 (ed. A. Poole & F. Gill). Philadelphia and Washington: The Academy of Natural Science and The American Ornithologists' Union.
- Johnson, L. S. 1998 House wren *Troglodytes aedon*. In *The birds of North America*. No. 380 (ed. A. Poole & F. Gill). Philadelphia and Washington: The Academy of Natural Science and The American Ornithologists' Union.
- Kempnaers, B., Verheyen, G. R. & Dhondt, A. A. 1995 Mate guarding and copulation behavior in monogamous and polygynous blue tits: do males follow a best-of-a-bad-job strategy? *Behav. Ecol. Sociobiol.* **36**, 33-42.
- Koenig, W. D. 1982 Ecological and social factors affecting hatchability of eggs. *Auk* **99**, 526-536.
- Kok, O. B., Roos, M. M. & Roos, Z. N. 1977 Broeisukses van Rooivinke in die Willem Pretorius-wildtuin. *Acta Acad. B* **10**, 5-11.
- Krokene, C., Anthonisen, K., Lifjeld, J. T. & Amundsen, T. 1996 Paternity and paternity assurance behaviour in the bluethroat, *Luscinia s. svecica*. *Anim. Behav.* **52**, 405-417.
- LaBranche, M. S. & Walters, J. R. 1994 Patterns of mortality in nests of red-cockaded woodpeckers in the sandhills of southcentral North Carolina. *Wilson Bull.* **106**, 258-271.
- Langefors, Å., Hasselquist, D. & von Schantz, T. 1998 Extra-pair fertilizations in the Sedge Warbler. *J. Avian Biol.* **29**, 134-144.
- Larsson, K., Teigelström, H. & Forslund, P. 1995 Intraspecific nest parasitism and adoption of young in the barnacle goose - effects on survival and reproductive performance. *Anim. Behav.* **50**, 1349-1360.
- Legge, S. 2000 The effect of helpers on reproductive success in the laughing kookaburra. *J. Anim. Ecol.* **69**, 714-724.

- Legge, S. & Cockburn, A. 2000 Social and mating systems of cooperatively breeding laughing kookaburras (*Dacelo novaeguineae*). *Behav. Ecol. Sociobiol.* **47**, 220-229.
- Leisler, B., Beier, J., Staudter, H. & Wink, M. 2000 Variation in extra-pair paternity in the polygynous Great Reed Warbler (*Acrocephalus arundinaceus*). *J. Ornithol.* **141**, 77-84.
- Leisler, B. & Wink, M. 2000 Frequencies of multiple paternity in three Acrocephalus species (Aves Sylviidae) with different mating systems (*A. palustris*, *A. arundinaceus*, *A. paludicola*). *Ethol. Ecol. Evol.* **12**, 237-249.
- Liffield, J. T., Dunn, P. O., Robertson, R. J. & Boag, P. T. 1993 Extra-pair paternity in monogamous tree swallows. *Anim. Behav.* **45**, 213-229.
- Liffield, J. T., Slagsvold, T. & Lampe, H. M. 1991 Low frequency of extra-pair paternity in pied flycatchers revealed by DNA fingerprinting. *Behav. Ecol. Sociobiol.* **29**, 95-101.
- Lindén, H. 1981 Estimation of juvenile mortality in the capercaillie, *Tetrao urogallus*, and the black grouse, *Tetrao tetrix*, from indirect evidence. *Finnish Game Res.* **39**, 35-51.
- Lorentsen, S.-H., Amundsen, T., Anthonisen, K. & Liffield, J. T. 2000 Molecular evidence for extrapair paternity and female-female pairs in a socially monogamous colonial seabird, the Antarctic Petrel. *Auk* **117**, 1050-1055.
- Lowther, P. E., Celada, C., Klein, N. K., Rimmer, C. C. & Spector, D. A. 1999 Yellow warbler *Dendroica petechia*. In *The birds of North America*. No. 454 (ed. A. Poole & F. Gill). Philadelphia and Washington: The Academy of Natural Science and The American Ornithologists' Union.
- Lubjuhn, T., Gerken, T., Brün, J. & Epplen, J. T. 1999 High frequency of extra-pair paternity in the Coal Tit. *J. Avian Biol.* **30**, 229-233.
- Lundberg, A. & Alatalo, R. V. 1992 *The Pied Flycatcher*. London: T. & A.D. Poyser.
- Lundy, K. J., Parker, P. G. & Zahavi, A. 1998 Reproduction by subordinates in cooperatively breeding Arabian babblers is uncommon but predictable. *Behav. Ecol. Sociobiol.* **43**, 173-180.
- Macedo, R. H. 1992 Reproductive patterns and social organisation of the communal guira cuckoo (*Guira guira*) in central Brazil. *Auk* **109**, 786-799.
- Marchant, S. & Higgins, P. J. (ed.) 1990 *Handbook of Australian, New Zealand and Antarctic birds. Vol. 1A. Melbourne: Oxford University Press.*
- Martín-Vivaldi, M. 1997 The behavioural ecology of the hoopoe *Upupa epops*. PhD thesis. Granada, Spain: University of Granada.

- Martín-Vivaldi, M., Palomino, J. J., Soler, M. & Soler, J. J. 1999 Determinants of reproductive success in the hoopoe *Upupa epops*, a hole-nesting non-passerine bird with asynchronous hatching. *Bird Study* **46**, 205-216.
- Martins, T. L. F., Blakey, J. K. & Wright, J. 2002 Low incidence of extra-pair paternity in the colonially nesting common swift *Apus apus*. *J. Avian Biol.* **33**, 441-446.
- Masello, J. F. & Quillfeldt, P. 2002 Chick growth and breeding success of the burrowing parrot. *Condor* **104**, 574-586.
- Masello, J. F., Sramkova, A., Quillfeldt, P., Eppeln, J. T. & Lubjuhn, T. 2002 Genetic monogamy in burrowing parrots *Cyanoliseus patagonus*? *J. Avian Biol.* **33**, 99-103.
- Mauck, R. A., Waite, T. A. & Parker, P. G. 1995 Monogamy in Leach's storm-petrel: DNA-fingerprinting evidence. *Auk* **112**, 473-482.
- Mawbray, T. B., Cooke, F. & Canter, B. 2000 Snow goose *Chen caerulescens*. In *The birds of North America. No. 514* (ed. A. Poole & F. Gill). Philadelphia and Washington: The Academy of Natural Science and The American Ornithologists' Union.
- McRae, S. B. & Burke, T. 1996 Intraspecific brood parasitism in the moorhen: parentage and parasite-host relationships determined by DNA fingerprinting. *Behav. Ecol. Sociobiol.* **38**, 115-129.
- Meek, S. B., Robertson, R. J. & Boag, P. T. 1994 Extrapair paternity and intraspecific brood parasitism in eastern bluebirds revealed by DNA-fingerprinting. *Auk* **111**, 739-744.
- Millar, C. D., Anthony, I., Lambert, D. M., Stapleton, P. M., Bergamm, C. C., Bellamy, A. R. & Young, E. C. 1994 Patterns of reproductive success determined by DNA fingerprinting in a communally breeding oceanic bird. *Biol. J. Linn. Soc.* **52**, 31-48.
- Millar, C. D., Lambert, D. M. & Young, E. C. 1997 Minisatellite DNA detects sex, parentage, and adoption in the south polar skua. *J. Hered.* **88**, 235-238.
- Møller, A. P. & Tegelström, H. 1997 Extra-pair paternity and tail ornamentation in the barn swallow *Hirundo rustica*. *Behav. Ecol. Sociobiol.* **41**, 353-360.
- Moorman, C. E., Guynn, D. C. J. & Kilgo, J. C. 2002 Hooded Warbler nesting success adjacent to group-selection and clearcut edges in a southeastern bottomland forest. *Condor* **104**, 366-377.
- Moreno, J., Boto, L., Fargallo, J. A., León, A. d. & Potti, J. 2000 Absence of extra-pair fertilisations in the Chinstrap Penguin *Pygoscelis antarctica*. *J. Avian Biol.* **31**, 580-582.

- Morton, E. S., Forman, L. & Braun, M. 1990 Extrapair fertilizations and the evolution of colonial breeding in purple martins. *Auk* **107**, 275-283.
- Müller, W., Eppelen, J. T. & Lubjuhn, T. 2001 Genetic paternity analyses in Little Owls (*Athene noctua*): does the high rate of paternal care select against extra-pair young? *J. Ornithol.* **142**, 195-203.
- Negro, J. J., Villarroel, M., Tella, J. L., Kuhnlein, U., Hiraldo, F., Donazar, J. A. & Bird, D. M. 1996 DNA fingerprinting reveals a low incidence of extra-pair fertilizations in the lesser kestrel. *Anim. Behav.* **51**, 935-943.
- Orell, M., Rytönen, S., Launonen, V., Welling, P., Koivula, K., Kumpulainen, K. & Bachmann, L. 1997 Low frequency extra-pair paternity in the willow tit *Parus montanus* as revealed by DNA fingerprinting. *Ibis* **139**, 562-566.
- Oring, L. W., Fleischer, R. C., Reed, J. M. & Marsden, K. E. 1992 Cuckoldry through stored sperm in the sequentially polyandrous spotted sandpiper. *Nature* **359**, 631-633.
- Oring, L. W., Lank, D. B. & Maxson, S. J. 1983 Population studies of the polyandrous spotted sandpiper. *Auk* **100**, 272-285.
- Otter, K., Ratcliffe, L., Michaud, D. & Boag, P. T. 1998 Do female black-capped chickadees prefer high-ranking males as extra-pair partners? *Behav. Ecol. Sociobiol.* **43**, 25-36.
- Parrott, D. 1995 Social organisation and extra-pair behaviour in the European black-billed magpie *Pica pica*. PhD thesis. Sheffield: University of Sheffield.
- Peterson, K. A., Thusius, K. J., Whittingham, L. A. & Dunn, P. O. 2001 Allocation of male parental care in relation to paternity within and among broods of the common yellowthroat (*Geothlypis trichas*). *Ethology* **107**, 573-586.
- Pierce, E. P. & Liffeld, J. T. 1998 High paternity without paternity assurance behavior in the purple sandpiper, a species with high paternal investment. *Auk* **115**, 602-612.
- Pilastro, A., Pezzo, F., Olmastroni, S., Callegarin, C., Corsolini, S. & Focardi, S. 2001 Extrapair paternity in the Adélie Penguin *Pygoscelis adeliae*. *Ibis* **143**, 681-684.
- Pinxten, R., Hanotte, O., Eens, M., Verheyen, R. F., Dhondt, A. A. & Burke, T. 1993 Extra-pair paternity and intraspecific brood parasitism in the European starling, *Sturnus vulgaris*: evidence from DNA fingerprinting. *Anim. Behav.* **45**, 795-809.



- Pöldmaa, T., Montgomerie, R. & Boag, P. 1995 Mating system of the cooperatively breeding noisy miner *Manorina melanocephala*, as revealed by DNA profiling. *Behav. Ecol. Sociobiol.* **37**, 137-143.
- Post, W., Poston, J. P. & Bancroft, G. T. 1996 Boat-tailed grackle *Quiscalus major*. In *The birds of North America*. No. 207 (ed. A. Poole & F. Gill). Philadelphia and Washington: The Academy of Natural Science and The American Ornithologists' Union.
- Poston, J. P., Wiley, R. H. & Westneat, D. F. 1999 Male rank, female breeding synchrony, and patterns of paternity in the boat-tailed grackle. *Behav. Ecol.* **10**, 444-451.
- Pratt, T. K., Banko, P. C., Fancy, S. G., Lindsey, G. D. & Jacobi, J. D. 1997 Status and management of the Palila, and endangered Hawaiian honeycreeper, 1987-1996. *Pacific Cons. Biol.* **3**, 330-340.
- Quillfeldt, P., Schmoll, T., Peter, H. U., Epplen, J. & Lubjuhn, T. 2001 Genetic monogamy in Wilson's Storm-Petrel. *Auk* **118**, 242-248.
- Quinn, J. S., Macedo, R. & White, B. N. 1994 Genetic relatedness of communally breeding guira cuckoos. *Anim. Behav.* **47**, 515-529.
- Quinn, J. S., Woolfenden, G. E., Fitzpatrick, J. W. & White, B. N. 1999 Multi-locus DNA fingerprinting supports genetic monogamy in Florida scrub-jays. *Behav. Ecol. Sociobiol.* **45**, 1-10.
- Rätti, O., Hovi, M., Lundberg, A., Tegelström, H. & Alatalo, R. V. 1995 Extra-pair paternity and male characteristics in the pied flycatcher. *Behav. Ecol. Sociobiol.* **37**, 419-425.
- Rauter, C. 1996 Environmental factors, parental care and reproductive performance in the water pipit. PhD thesis: University of Zürich.
- Reyer, H. U., Bollmann, K., Schläpfer, A. R., Schymainda, A. & Kleck, G. 1997 Ecological determinants of extrapair fertilizations and egg dumping in Alpine water pipits (*Anthus spinoletta*). *Behav. Ecol.* **8**, 534-543.
- Richdale, L. E. 1941 A brief summary of the history of the yellow-eyed penguin. *Emu* **40**, 265-287.
- Riley, H. T., Bryant, D. M., Carter, R. E. & Parkin, D. T. 1995 Extra-pair fertilizations and paternity defense in house martins, *Delichon urbica*. *Anim. Behav.* **49**, 495-509.
- Ritchison, G., Klatt, P. H. & Westneat, D. F. 1994 Mate guarding and extra-pair paternity in northern cardinals. *Condor* **96**, 1055-1063.

- Robertson, B. C., Degnan, S. M., Kikkawa, J. & Moritz, C. C. 2001 Genetic monogamy in the absence of paternity guards: the Capricorn Silvereye, *Zosterops chlorocephalus*, on Heron Island. *Behav. Ecol.* **12**, 666-673.
- Robertson, R. J., Stutchbury, B. J. & Cohen, R. R. 1992 Tree swallow *Tachycineta bicolor*. In *The birds of North America. No. 11* (ed. A. Poole & F. Gill). Philadelphia and Washington: The Academy of Natural Science and The American Ornithologists' Union.
- Rowe, D. L., Murphy, M. T., Fleischer, R. C. & Wolf, P. G. 2001 High frequency of extra-pair paternity in eastern kingbirds. *Condor* **103**, 845-851.
- Ryder, J. P. & Alisauskas, R. T. 1995 Ross' goose *Chen rossii*. In *The birds of North America. No. 162* (ed. A. Poole & F. Gill). Philadelphia and Washington: The Academy of Natural Science and The American Ornithologists' Union.
- Sandercok, B. K. 1997 Incubation capacity and clutch size determination in two calidrine sandpipers: a test of the four-egg threshold. *Oecologia* **110**, 50-59.
- Schleicher, B., Hoi, H., Valera, F. & Hoi-Leitner, M. 1997 The importance of different paternity guards in the polygynandrous penduline tit (*Remiz pendulinus*). *Behaviour* **134**, 941-959.
- Schönn, S., Scherzinger, W., Exo, K.-M. & Ille, R. 1991 *Der Steinkauz Die Neue Brehm-Bücherei*. Wittenberg Lutherstadt: A. Ziemsen Verlag.
- Sheldon, B. C. & Burke, T. 1994 Copulation behavior and paternity in the chaffinch. *Behav. Ecol. Sociobiol.* **34**, 149-156.
- Smith, H. D., Wennerberg, L. & Schantz, T. v. 1996 Sperm competition in the European starling (*Sturnus vulgaris*): an experimental study of mate switching. *Proc. R. Soc. Lond. B* **263**, 797-801.
- Smith, H. G. & von Schantz, T. 1993 Extra-pair paternity in the European starling: the effect of polygyny. *Condor* **95**, 1006-1015.
- Sodhi, N. S., Oliphant, L. W., James, P. C. & Warkentin, I. G. 1993 Merlin *Falco columbarius*. In *The birds of North America. No. 44* (ed. A. Poole & F. Gill). Philadelphia and Washington: The Academy of Natural Science and The American Ornithologists' Union.
- Soukup, S. S. & Thompson, C. F. 1997 Social mating system affects the frequency of extra-pair paternity in house wrens. *Anim. Behav.* **54**, 1089-1105.
- St Clair, C. C., Waas, J. R., St Clair, R. C. & Boag, P. T. 1995 Unfit mothers? Maternal infanticide in royal penguins. *Anim. Behav.* **50**, 1177-1185.
- Stutchbury, B. J. M., Piper, W. H., Neudorf, D. L., Tarof, S. A., Rhymer, J. M., Fuller, G. & Fleischer, R. C. 1997 Correlates of extra-pair fertilization success in hooded warblers. *Behav. Ecol. Sociobiol.* **40**, 119-126.

- Swatschek, I., Ristow, D., Scharlau, W., Wink, C. & Wink, M. 1993 Populationsgenetik und Vaterschaftsanalyse beim Elmorenfalken (*Falco eleonorae*). *J. Ornithol.* **134**, 137-143.
- Swatschek, I., Ristow, D. & Wink, M. 1994 Mate fidelity and parentage in Cory's shearwater *Calonectris diomedea* - field studies and DNA-fingerprinting. *Mol. Ecol.* **3**, 259-262.
- Valkeajärvi, P. & Ijäs, L. 1994 Comparison of breeding success between fed and unfed black grouse in Central Finland. *Suomen Riista* **40**, 98-109.
- Veiga, J. P. & Boto, L. 2000 Low frequency of extra-pair fertilisations in House Sparrows breeding at high density. *J. Avian Biol.* **31**, 237-244.
- Villarroel, M., Bird, D. M. & Kuhnlein, U. 1998 Copulatory behaviour and paternity in the American kestrel: the adaptive significance of frequent copulations. *Anim. Behav.* **56**, 289-299.
- Wagner, R. H., Schug, M. D. & Morton, E. S. 1996 Condition-dependent control of paternity by female purple martins: implications for coloniality. *Behav. Ecol. Sociobiol.* **38**, 379-389.
- Wallander, J., Blomqvist, D. & Liffeld, J. T. 2001 Genetic and social monogamy - does it occur without male mate guarding in the ringed plover *Charadrius hiaticula*? *Ethology* **107**, 561-572.
- Warkentin, I. G., Curzon, A. D., Carter, R. E., Wetton, J. H., James, P. C., Oliphant, L. W. & Parkin, D. T. 1994 No evidence for extrapair fertilizations in the merlin revealed by DNA-fingerprinting. *Mol. Ecol.* **3**, 229-234.
- Westneat, D. F. 1993 Polygyny and extrapair fertilizations in eastern red-winged blackbirds (*Agelaius phoeniceus*). *Behav. Ecol.* **4**, 49-60.
- Wheelwright, N. T. & Rising, J. D. 1993 Savannah sparrow *Passerculus sandwichensis*. In *The birds of North America*. No. 45 (ed. A. Poole & F. Gill). Philadelphia and Washington: The Academy of Natural Science and The American Ornithologists' Union.
- Whitekiller, R. R., Westneat, D. F., Douglas, R. V., Schwagmeyer, P. L. & Mock, D. W. 2000 Badge size and extra-pair fertilizations in the House Sparrow. *Condor* **102**, 342-348.
- Whittingham, L. A., Dunn, P. O. & Magrath, R. D. 1997 Relatedness, polyandry and extra-group paternity in the cooperatively breeding white-browed scrubwren (*Sericornis frontalis*). *Behav. Ecol. Sociobiol.* **40**, 261-270.
- Woolfenden, G. E. & Fitzpatrick, J. W. 1984 *The Florida Scrub Jay: Demography of a Cooperative-Breeding Bird*. Princeton: Princeton University Press.

Yasukawa, K. & Searcy, W. A. 1995 Red-winged blackbird *Agelaius phoeniceus*. In *The birds of North America*. No. 184 (ed. A. Poole & F. Gill).

Philadelphia and Washington: The Academy of Natural Science and The American Ornithologists' Union.

Yezerinac, S. M., Weatherhead, P. J. & Boag, P. T. 1996 Cuckoldry and lack of parentage-dependent paternal care in yellow warblers: a cost-benefit approach. *Anim. Behav.* **52**, 821-832.

Young, E. 1994 *Skua and Penguin: Predator and Prey*. Cambridge: Cambridge University Press.

Zann, R. A. 1996 *The Zebra Finch*. Oxford: Oxford University Press.

Zilberman, R., Moav, B. & Yom-Tov, Y. 1999 Extra-pair paternity in the socially monogamous orange-tufted sunbird (*Nectarinia osea osea*). *Israel J. Zool.* **45**, 407-421.

**Electronic Appendix B.** Phylogenetic hypothesis used in the comparative analyses. Higher nodes were based on Sibley and Ahlquist (1990) mainly for non-passerines and on Barker et al. (2002) for passerines, whereas resolution closer to the tips was obtained from Cibois & Pasquet (1999), Leisler et al. (1997), Nunn & Stanley (1998), Sheldon et al. (1992), Sheldon & Winkler (1993), Suhonen et al. (1994) and Wink et al. (1998). Note that the clade at the bottom of Fig. 1A connects to Fig. 1B.

## References

- Barker, F. K., Barrowclough, G. F. & Groth, J. G. 2002 A phylogenetic hypothesis for passerine birds: taxonomic and biogeographic implications of an analysis of nuclear DNA sequence data. *Proc. R. Soc. Lond. B* **269**, 295-308.
- Cibois, A. & Pasquet, E. 1999 Molecular analysis of the phylogeny of 11 genera of the Corvidae. *Ibis* **141**, 297-306.
- Leisler, B., Heidrich, P., Schulze-Hagen, K. & Wink, M. 1997 Taxonomy and phylogeny of reed warblers (genus *Acrocephalus*) based on mtDNA sequences and morphology. *J. Ornith.* **138**, 469-496.
- Nunn, G. B. & Stanley, S. E. 1998 Body size effects and rate of cytochrome *b* evolution in tube-nosed seabirds. *Mol. Biol. Evol.* **15**, 1360-1371.

- Sheldon, F. H., Slikas, B., Kinnamey, M., Gill, F. B., Zhao, E. & Silverin, B. 1992 DNA-DNA hybridization evidence of phylogenetic relationships among major lineages of *Parus*. *Auk* **109**, 173-185.
- Sheldon, F. H. & Winkler, D. W. 1993 Intergeneric phylogenetic relationships of swallows estimated by DNA-DNA hybridization. *Auk* **110**, 798-824.
- Sibley, C. G. & Ahlquist, J. E. 1990 *Phylogeny and Classification of Birds*. New Haven: Yale University Press.
- Suhonen, J., Alatalo, R. V. & Gustafsson, L. 1994 Evolution of foraging ecology in Fennoscandian tits. *Proc. R. Soc. Lond. B* **258**, 127-131.
- Wink, M., Seibold, I., Lotfikhah, F. & Bednarek, W. 1998 Molecular systematics of Holarctic raptors (Order Falconiformes). In *Holarctic Birds of Prey* (ed. R. D. Chancellor, B.-U. Meyburg & J. J. Ferrero), pp. 29-48: ADENEX-WWGBP.

**Electronic Appendix B.** Phylogenetic hypothesis used in the comparative analyses. Higher nodes were based on Sibley and Ahlquist (1990) mainly for non-passerines and on Barker et al. (2002) for passerines, whereas resolution closer to the tips was obtained from Cibois & Pasquet (1999), Leisler et al. (1997), Nunn & Stanley (1998), Sheldon et al. (1992), Sheldon & Winkler (1993), Suhonen et al. (1994) and Wink et al. (1998). Note that the clade at the bottom of Fig. 1A connects to Fig. 1B.

## References

- Barker, F. K., Barrowclough, G. F. & Groth, J. G. 2002 A phylogenetic hypothesis for passerine birds: taxonomic and biogeographic implications of an analysis of nuclear DNA sequence data. *Proc. R. Soc. Lond. B* **269**, 295-308.
- Cibois, A. & Pasquet, E. 1999 Molecular analysis of the phylogeny of 11 genera of the Corvidae. *Ibis* **141**, 297-306.
- Leisler, B., Heidrich, P., Schulze-Hagen, K. & Wink, M. 1997 Taxonomy and phylogeny of reed warblers (genus *Acrocephalus*) based on mtDNA sequences and morphology. *J. Ornith.* **138**, 469-496.

- Nunn, G. B. & Stanley, S. E. 1998 Body size effects and rate of cytochrome *b* evolution in tube-nosed seabirds. *Mol. Biol. Evol.* **15**, 1360-1371.
- Sheldon, F. H., Slikas, B., Kinnamey, M., Gill, F. B., Zhao, E. & Silverin, B. 1992 DNA-DNA hybridization evidence of phylogenetic relationships among major lineages of *Parus*. *Auk* **109**, 173-185.
- Sheldon, F. H. & Winkler, D. W. 1993 Intergeneric phylogenetic relationships of swallows estimated by DNA-DNA hybridization. *Auk* **110**, 798-824.
- Sibley, C. G. & Ahlquist, J. E. 1990 *Phylogeny and Classification of Birds*. New Haven: Yale University Press.
- Suhonen, J., Alatalo, R. V. & Gustafsson, L. 1994 Evolution of foraging ecology in Fennoscandian tits. *Proc. R. Soc. Lond. B* **258**, 127-131.
- Wink, M., Seibold, I., Loffikhah, F. & Bednarek, W. 1998 Molecular systematics of Holarctic raptors (Order Falconiformes). In *Holarctic Birds of Prey* (ed. R. D. Chancellor, B.-U. Meyburg & J. J. Ferrero), pp. 29-48: ADENEX-WWGBP.
- 

**Electronic Appendix B.** Phylogenetic hypothesis used in the comparative analyses. Higher nodes were based on Sibley and Ahlquist (1990) mainly for non-passerines and on Barker et al. (2002) for passerines, whereas resolution closer to the tips was obtained from Cibois & Pasquet (1999), Leisler et al. (1997), Nunn & Stanley (1998), Sheldon et al. (1992), Sheldon & Winkler (1993), Suhonen et al. (1994) and Wink et al. (1998). Note that the clade at the bottom of Fig. 1A connects to Fig. 1B.

## References

- Barker, F. K., Barrowclough, G. F. & Groth, J. G. 2002 A phylogenetic hypothesis for passerine birds: taxonomic and biogeographic implications of an analysis of nuclear DNA sequence data. *Proc. R. Soc. Lond. B* **269**, 295-308.
- Cibois, A. & Pasquet, E. 1999 Molecular analysis of the phylogeny of 11 genera of the Corvidae. *Ibis* **141**, 297-306.
- Leisler, B., Heidrich, P., Schulze-Hagen, K. & Wink, M. 1997 Taxonomy and phylogeny of reed warblers (genus *Acrocephalus*) based on mtDNA sequences and morphology. *J. Ornith.* **138**, 469-496.
- Nunn, G. B. & Stanley, S. E. 1998 Body size effects and rate of cytochrome *b* evolution in tube-nosed seabirds. *Mol. Biol. Evol.* **15**, 1360-1371.

- Sheldon, F. H., Slikas, B., Kinnamey, M., Gill, F. B., Zhao, E. & Silverin, B. 1992 DNA-DNA hybridization evidence of phylogenetic relationships among major lineages of *Parus*. *Auk* **109**, 173-185.
- Sheldon, F. H. & Winkler, D. W. 1993 Intergeneric phylogenetic relationships of swallows estimated by DNA-DNA hybridization. *Auk* **110**, 798-824.
- Sibley, C. G. & Ahlquist, J. E. 1990 *Phylogeny and Classification of Birds*. New Haven: Yale University Press.
- Suhonen, J., Alatalo, R. V. & Gustafsson, L. 1994 Evolution of foraging ecology in Fennoscandian tits. *Proc. R. Soc. Lond. B* **258**, 127-131.
- Wink, M., Seibold, I., Lotfikhah, F. & Bednarek, W. 1998 Molecular systematics of Holarctic raptors (Order Falconiformes). In *Holarctic Birds of Prey* (ed. R. D. Chancellor, B.-U. Meyburg & J. J. Ferrero), pp. 29-48: ADENEX-WWGBP.
